# Supplementary material for: High ion barrier hydrogel with excellent toughness achieved by directional structures
Source: Royal Society of Chemistry journal article supplement (doi:10.1039/d4ra04822a), 2024-01-01
Supplement: d4ra04822a5.pdf [file d4ra04822a5.pdf]

1 **High Ion Barrier Hydrogel with Excellent Toughness Achieved by**  
2 **Directional Structures**

3 Zezhou Yang,<sup>a</sup> Zhiyu Zhao,<sup>a</sup> Dongsheng Yang,<sup>b</sup> Liangyu Zhu<sup>c</sup>, Zirou Qiu,<sup>a</sup> Yifan Wu,<sup>a</sup> Cheng Lan,<sup>a</sup>  
4 Wenchuan Jiang,<sup>a</sup> Geng Li,<sup>d</sup> Bin Zhong,<sup>d</sup> Jin Wei,<sup>d</sup> Tao Liu<sup>\*a</sup> and Heping Xie<sup>a</sup>

5 a. State Key Laboratory of Intelligent Construction and Healthy Operation and Maintenance of Deep  
6 Underground Engineering, Institute of New Energy and Low-Carbon Technology, Sichuan University, Chengdu  
7 610065, Sichuan, China.

8 b. College of Polymer Science and Engineering, Sichuan University, Chengdu 610065, Sichuan, China.

9 c. State Key Laboratory of Oil and Gas Reservoir Geology and Exploitation, Southwest Petroleum University,  
10 Chengdu 610500, Sichuan, China.

11 d. Dongfang Electric Qineng (Shenzhen) Technology Co., Ltd., Shenzhen 518000, Guangzhou, China.

12 \*Corresponding author: Tao Liu, E-mail: liutao3200023@scu.edu.cn

13 Table S1. Light transmittance of PVA hydrogels prepared at different sodium citrate salting-out concentrations

| SC concentration \ Wave | 425   | 450   | 485   | 550   | 590   | 600   | 700   | Average value |
|-------------------------|-------|-------|-------|-------|-------|-------|-------|---------------|
| No salting-out          | 89.95 | 90.42 | 91.00 | 91.92 | 92.41 | 92.51 | 93.29 | 91.64         |
| 0.5M                    | 85.85 | 85.84 | 85.70 | 85.49 | 85.50 | 85.51 | 85.38 | 85.61         |
| 1.0M                    | 88.82 | 89.00 | 89.03 | 88.97 | 88.98 | 88.98 | 88.71 | 88.93         |
| 1.5M                    | 85.95 | 86.12 | 86.18 | 86.13 | 86.10 | 86.12 | 86.18 | 86.11         |
| Saturated               | 83.05 | 83.25 | 83.27 | 83.25 | 83.27 | 83.23 | 83.14 | 83.21         |

15 Table S2. Light transmittance of PVA hydrogels prepared at different sodium citrate salting-out times

| Time<br>/h     | Wave  |       |       |       |       |       |       | Average<br>value |
|----------------|-------|-------|-------|-------|-------|-------|-------|------------------|
|                | 425   | 450   | 485   | 550   | 590   | 600   | 700   |                  |
| No salting-out | 89.95 | 90.42 | 91.00 | 91.92 | 92.41 | 92.51 | 93.29 | 91.64            |
| 3h             | 76.40 | 76.74 | 77.25 | 78.26 | 78.73 | 78.84 | 79.46 | 77.96            |
| 6h             | 80.15 | 80.25 | 80.32 | 80.36 | 80.38 | 80.40 | 80.30 | 80.31            |
| 12h            | 79.44 | 79.54 | 79.55 | 79.47 | 79.42 | 79.42 | 79.09 | 79.42            |
| 24h            | 83.06 | 83.23 | 83.28 | 83.31 | 83.30 | 83.28 | 83.05 | 83.21            |
| 48h            | 82.84 | 83.27 | 83.56 | 84.08 | 84.20 | 84.23 | 84.12 | 83.76            |

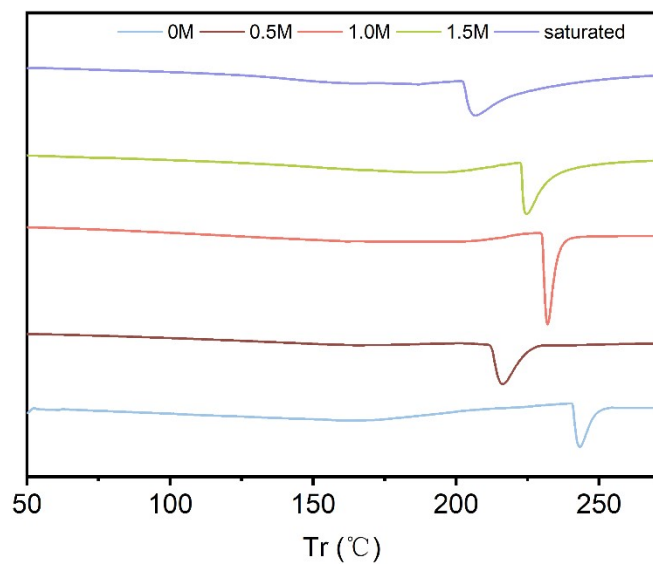

17

18 Fig S1 Heat flow curve of DFPVA prepared under various salting-out solution concentrations.

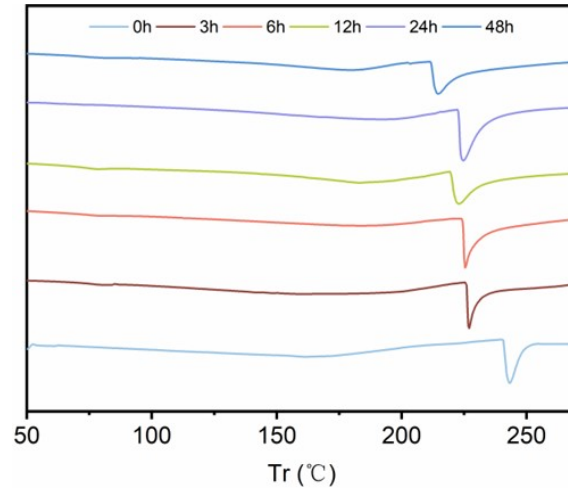

19

20

Fig S2 Heat flow curve of DFPVA prepared under various salting-out times.

21

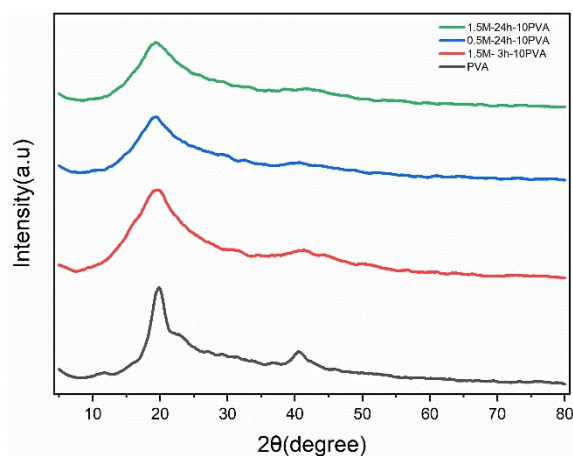

22

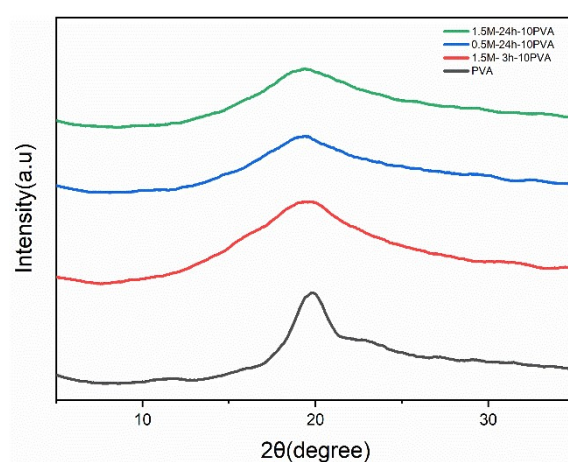

23

24 Fig S3 XRD of pure PVA, 0.5M salting-out for 24 h, 1.5M salting-out for 24 h, and 1.5 M  
25 salting-out for 3 h samples.

26

27

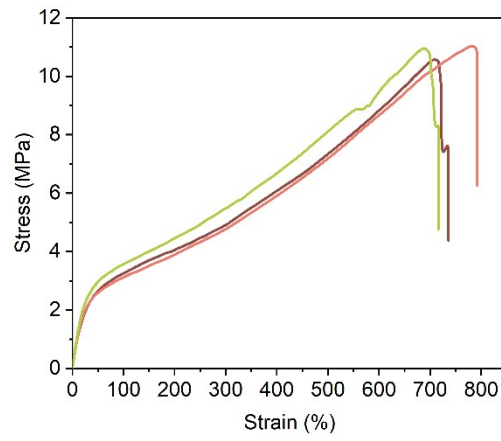

28

29

30

31

32

Fig. S4 Stress–strain curves of the DFPVA hydrogels after 24 h of salting out in saturated sodium citrate.

33 Error analysis:

34       Due to the loose internal structure of the gel and high initial water content, a  
35 large standard deviation appeared in the WVTR (Fig. 2c) within the first 24 h.  
36 Subsequently, the standard deviation fluctuations decreased, and the WVTR values  
37 tended to stabilize. Under low-intensity salting-out conditions (0.5 M sodium citrate,  
38 3 h), the material density was too low, and the material was relatively soft and fragile.  
39 According to the Cl<sup>-</sup> permeability data (Fig. 4b, c), the 0.5 M and 3 h samples also  
40 exhibited large standard deviations. As the sodium citrate concentration increased, the  
41 standard deviation decreased, and the data became more stable. Although relatively  
42 large standard deviations exist under certain conditions, the repeated experiments  
43 demonstrated overall reasonable repeatability of the data and conformance with the  
44 expected related patterns.
