# Supplementary material for: High ion barrier hydrogel with excellent toughness achieved by directional structures
Source: Royal Society of Chemistry journal article supplement (doi:10.1039/d4ra04822a), 2024-01-01
Supplement: d4ra04822a6.pdf [file d4ra04822a6.pdf]

Table S1. Light transmittance of PVA hydrogels prepared at different sodium citrate salting-out concentrations

| <b>Wave</b>          |       |       |       |       |       |       |       | <b>average</b> |
|----------------------|-------|-------|-------|-------|-------|-------|-------|----------------|
| <b>SC</b>            | 425   | 450   | 485   | 550   | 590   | 600   | 700   | <b>value</b>   |
| <b>concentration</b> |       |       |       |       |       |       |       |                |
| no salting-out       | 89.95 | 90.42 | 91.00 | 91.92 | 92.41 | 92.51 | 93.29 | 91.64          |
| 0.5M                 | 85.85 | 85.84 | 85.70 | 85.49 | 85.50 | 85.51 | 85.38 | 85.61          |
| 1.0M                 | 88.82 | 89.00 | 89.03 | 88.97 | 88.98 | 88.98 | 88.71 | 88.93          |
| 1.5M                 | 85.95 | 86.12 | 86.18 | 86.13 | 86.10 | 86.12 | 86.18 | 86.11          |
| 2.0M                 | 83.05 | 83.25 | 83.27 | 83.25 | 83.27 | 83.23 | 83.14 | 83.21          |
