# Supplementary material for: High ion barrier hydrogel with excellent toughness achieved by directional structures
Source: Royal Society of Chemistry journal article supplement (doi:10.1039/d4ra04822a), 2024-01-01
Supplement: d4ra04822a7.pdf [file d4ra04822a7.pdf]

Table S2. Light transmittance of PVA hydrogels prepared at different sodium citrate salting-out times

| <b>Time</b><br><b>/h</b> | <b>Wave</b> | 425   | 450   | 485   | 550   | 590   | 600   | 700   | average<br>value |
|--------------------------|-------------|-------|-------|-------|-------|-------|-------|-------|------------------|
| no salting-out           |             | 89.95 | 90.42 | 91.00 | 91.92 | 92.41 | 92.51 | 93.29 | 91.64            |
| 3h                       |             | 76.40 | 76.74 | 77.25 | 78.26 | 78.73 | 78.84 | 79.46 | 77.96            |
| 6h                       |             | 80.15 | 80.25 | 80.32 | 80.36 | 80.38 | 80.40 | 80.30 | 80.31            |
| 12h                      |             | 79.44 | 79.54 | 79.55 | 79.47 | 79.42 | 79.42 | 79.09 | 79.42            |
| 24h                      |             | 83.06 | 83.23 | 83.28 | 83.31 | 83.30 | 83.28 | 83.05 | 83.21            |
| 48h                      |             | 82.84 | 83.27 | 83.56 | 84.08 | 84.20 | 84.23 | 84.12 | 83.76            |
