# Supplementary figures and images for: High ion barrier hydrogel with excellent toughness achieved by directional structures
Source: Royal Society of Chemistry journal article supplement (doi:10.1039/d4ra04822a), 2024-01-01

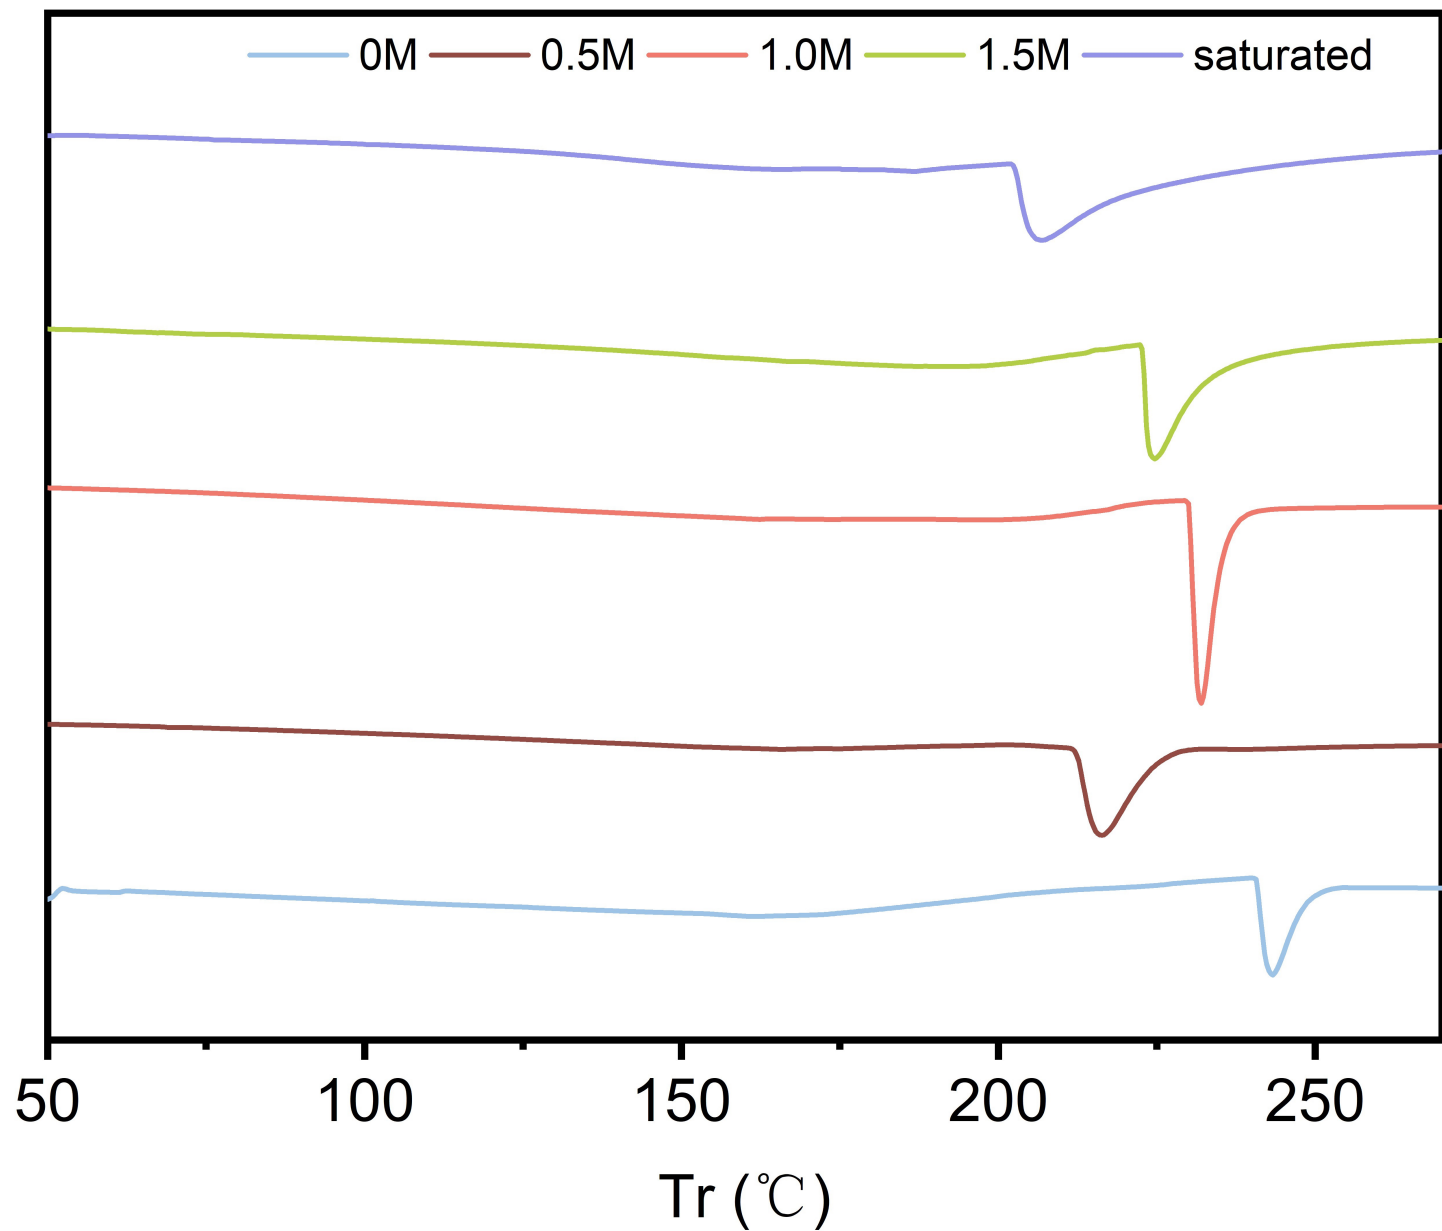

Supplement: d4ra04822a1.pdf [file d4ra04822a1.pdf]

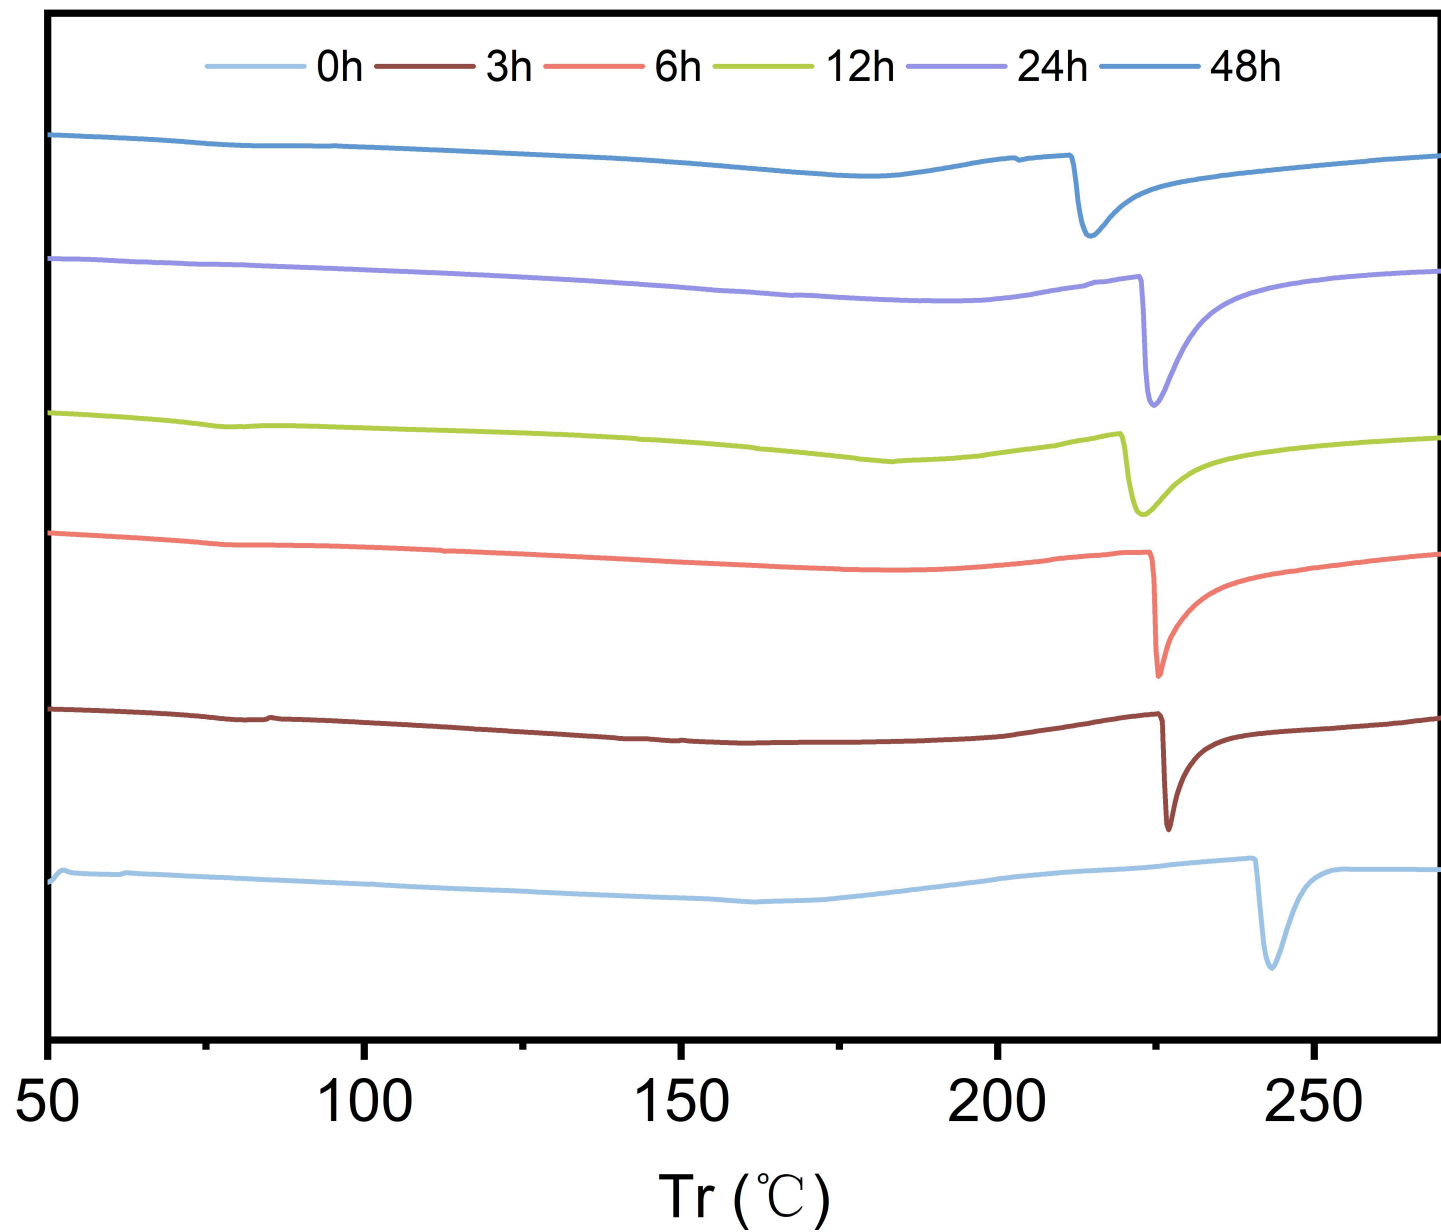

Supplement: d4ra04822a2.pdf [file d4ra04822a2.pdf]

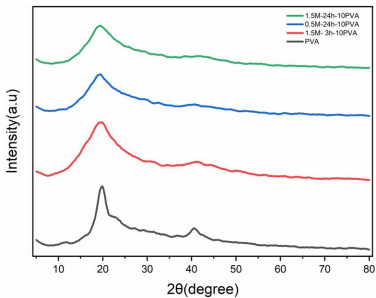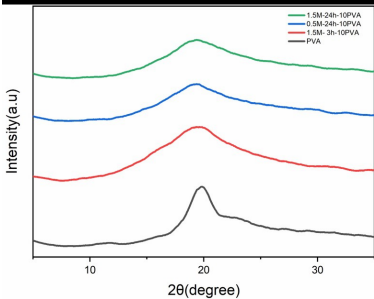

Supplement: d4ra04822a3.pdf [file d4ra04822a3.pdf]

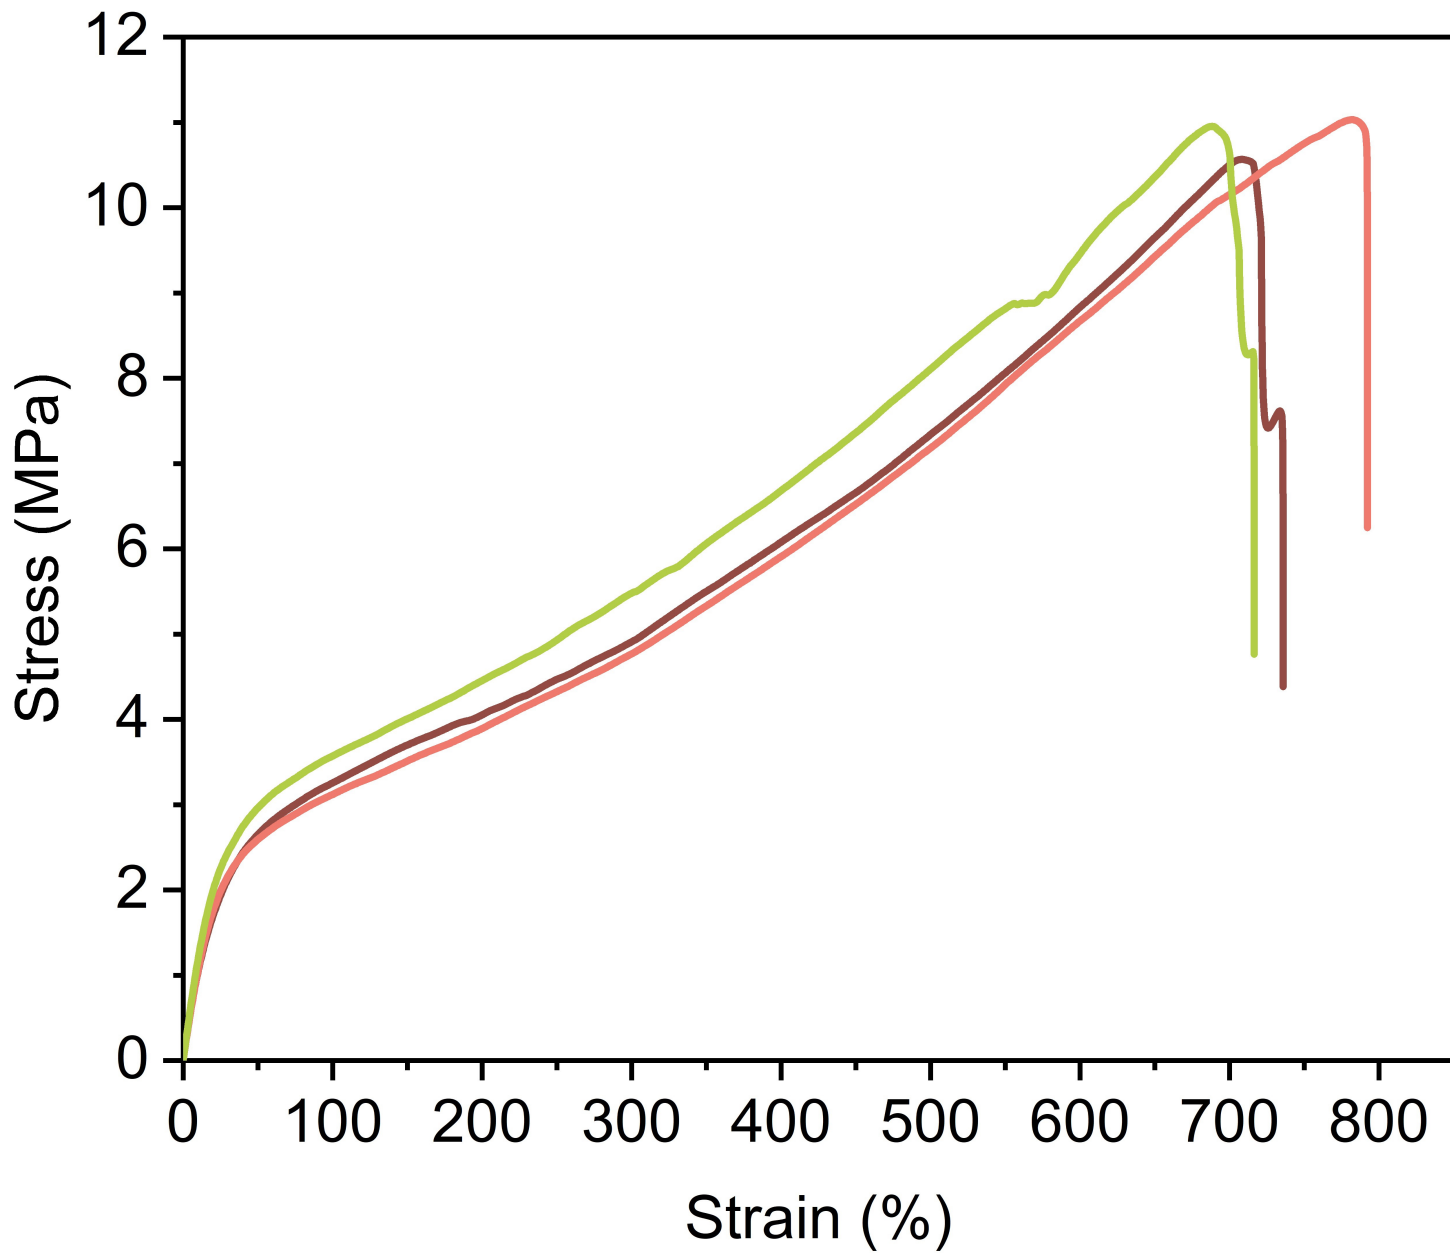

Supplement: d4ra04822a4.pdf [file d4ra04822a4.pdf]
